# Supplementary material for: Bioleaching of Valuable Elements from Red Mud: A Study on the Potential of Non-Enriched Biomass
Source: MDPI journal article supplement (doi:10.3390/min13070856), 2023-06-24
Supplement: s1 [file s1]

# **Bioleaching of Valuable Elements from Red Mud: A Study on the Potential of Non-Enriched Biomass**

Anna Cozzolino <sup>1</sup>, Giovanna Cappai <sup>\*,1,2</sup>, Stefano Cara <sup>2</sup>, Stefano Milia <sup>\*,2</sup>, Riccardo Ardu<sup>1,3</sup>, Elena Tamburini <sup>3</sup>, Alessandra Carucci <sup>1,2</sup>

<sup>1</sup> Department of Civil-Environmental Engineering and Architecture (DICAAR), University of Cagliari, Via Marengo 2, 09123 Cagliari, Italy

<sup>2</sup> National Research Council of Italy - Institute of Environmental Geology and Geoengineering (CNR-IGAG), Via Marengo 2 - 09123, Cagliari, Italy

<sup>3</sup> Department of Biomedical Sciences, University of Cagliari, 09042 Monserrato, Italy

\* Corresponding authors:

E-mail address: gcappai@unica.it

Department of Civil-Environmental Engineering and Architecture (DICAAR), University of Cagliari,

Via Marengo 2, 09123 Cagliari, Italy

E-mail address: stefano.milia@cnr.it

National Research Council of Italy - Institute of Environmental Geology and Geoengineering (CNR-IGAG), Via

Marengo 2 - 09123, Cagliari, Italy

## **Supplementary Materials**

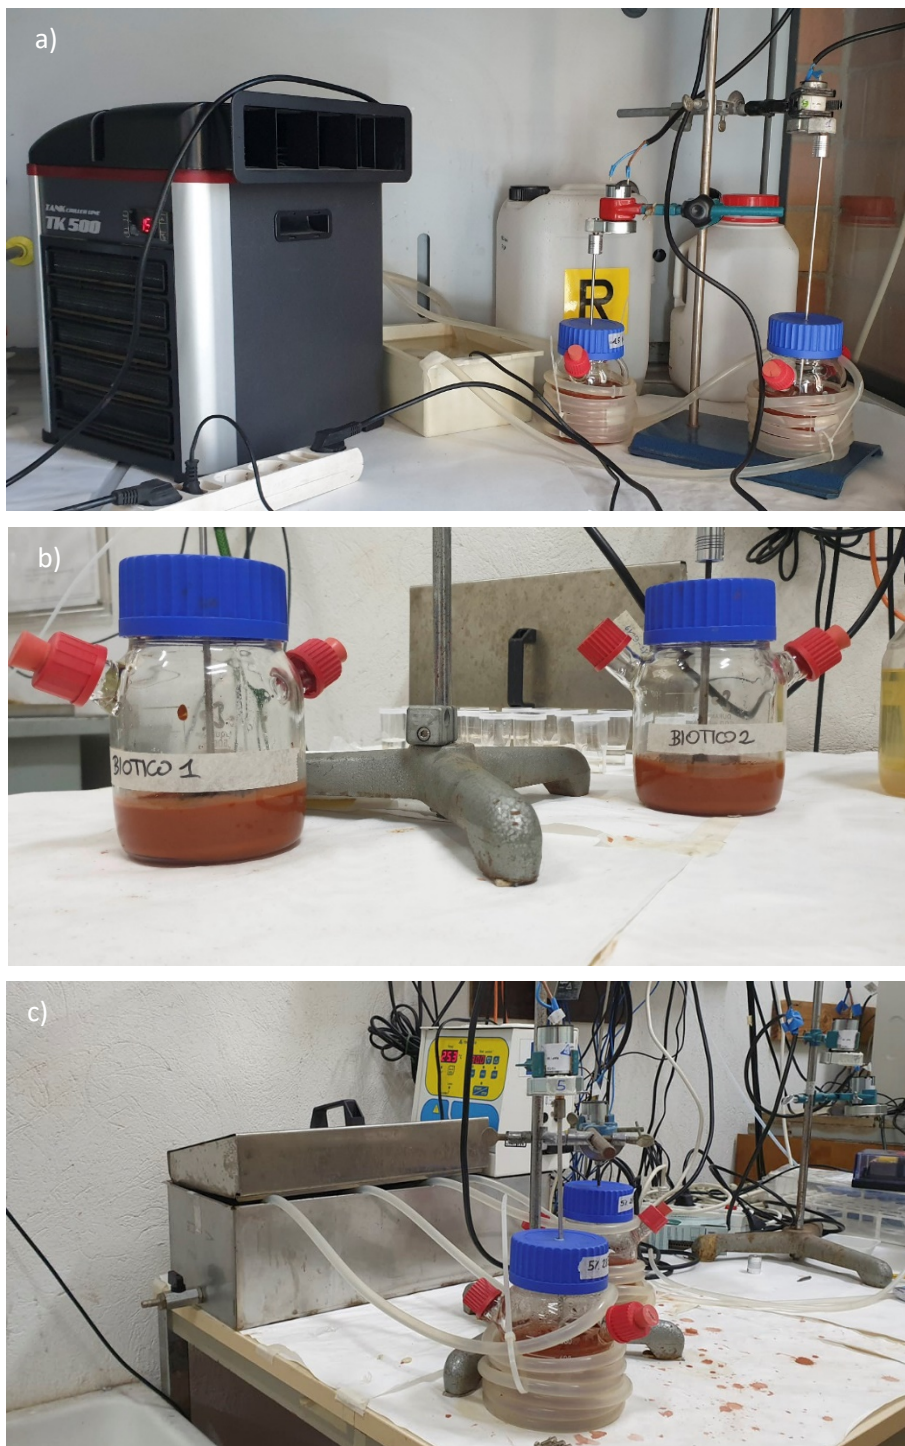

*Figure S1. Experimental setup for bioleaching tests carried out at low (a), room (b), and high temperature (c).*

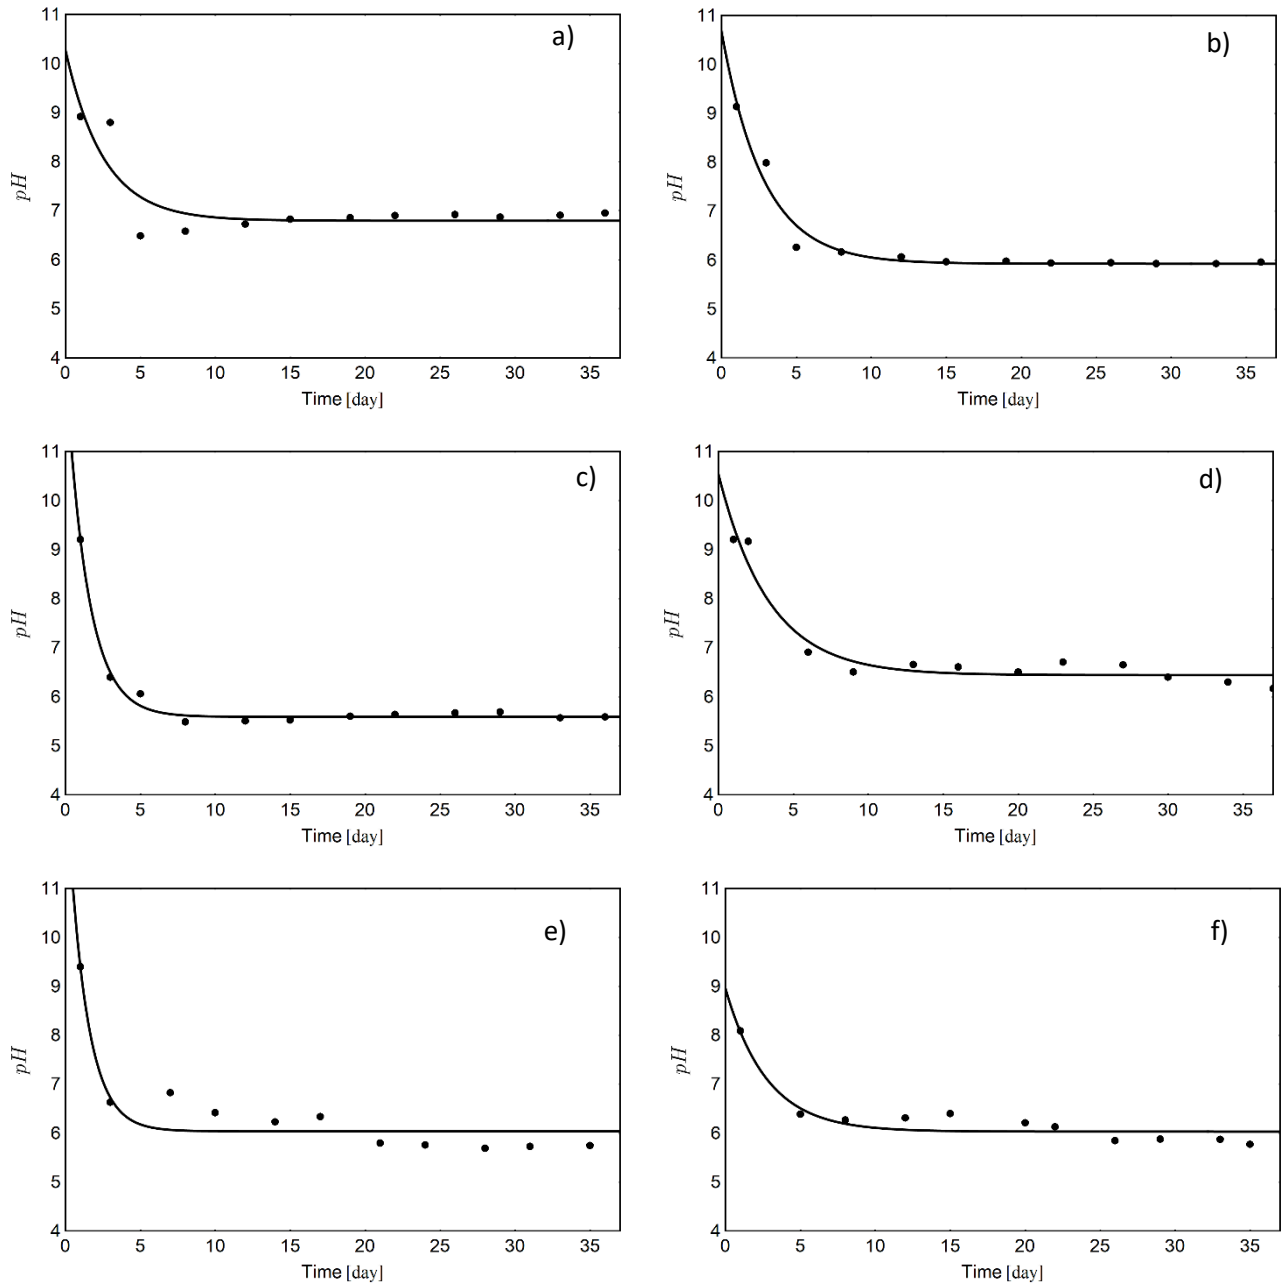

Figure S2. Pseudo-first order model fitting for RM-II\_2%\_15 °C (a) ( $R^2=0.72$ ), RM-II\_2%\_22 °C (b) ( $R^2=0.96$ ), RM-II\_2%\_28 °C (c) ( $R^2=0.98$ ), RM-II\_5%\_15 °C (d) ( $R^2=0.93$ ), RM-II\_5%\_22 °C (e) ( $R^2=0.85$ ), RM-II\_5%\_28 °C (a) ( $R^2=0.87$ )

$$PFO = pH^\infty(1 - n \cdot e^{-\omega t}) \quad (S1)$$

$$R^2 = 1 - \frac{\sum_1^n (Y_{sp.} - Y_{fit})^2}{\sum_1^n (Y_{sp.} - Y_{sp. \text{ average}})^2} \quad (S2)$$

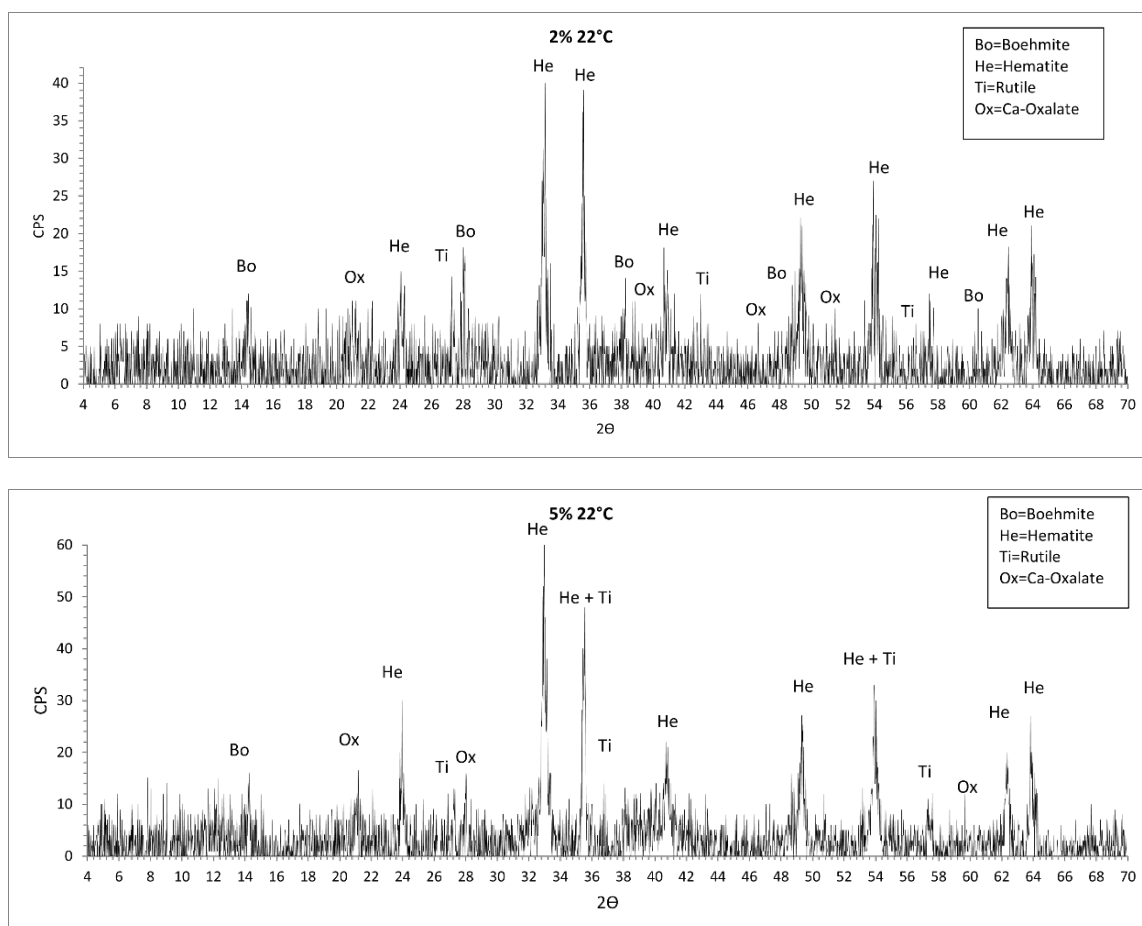

Figure S3. XRD patterns of treated RM-II samples at different S/L ratios and 22 °C

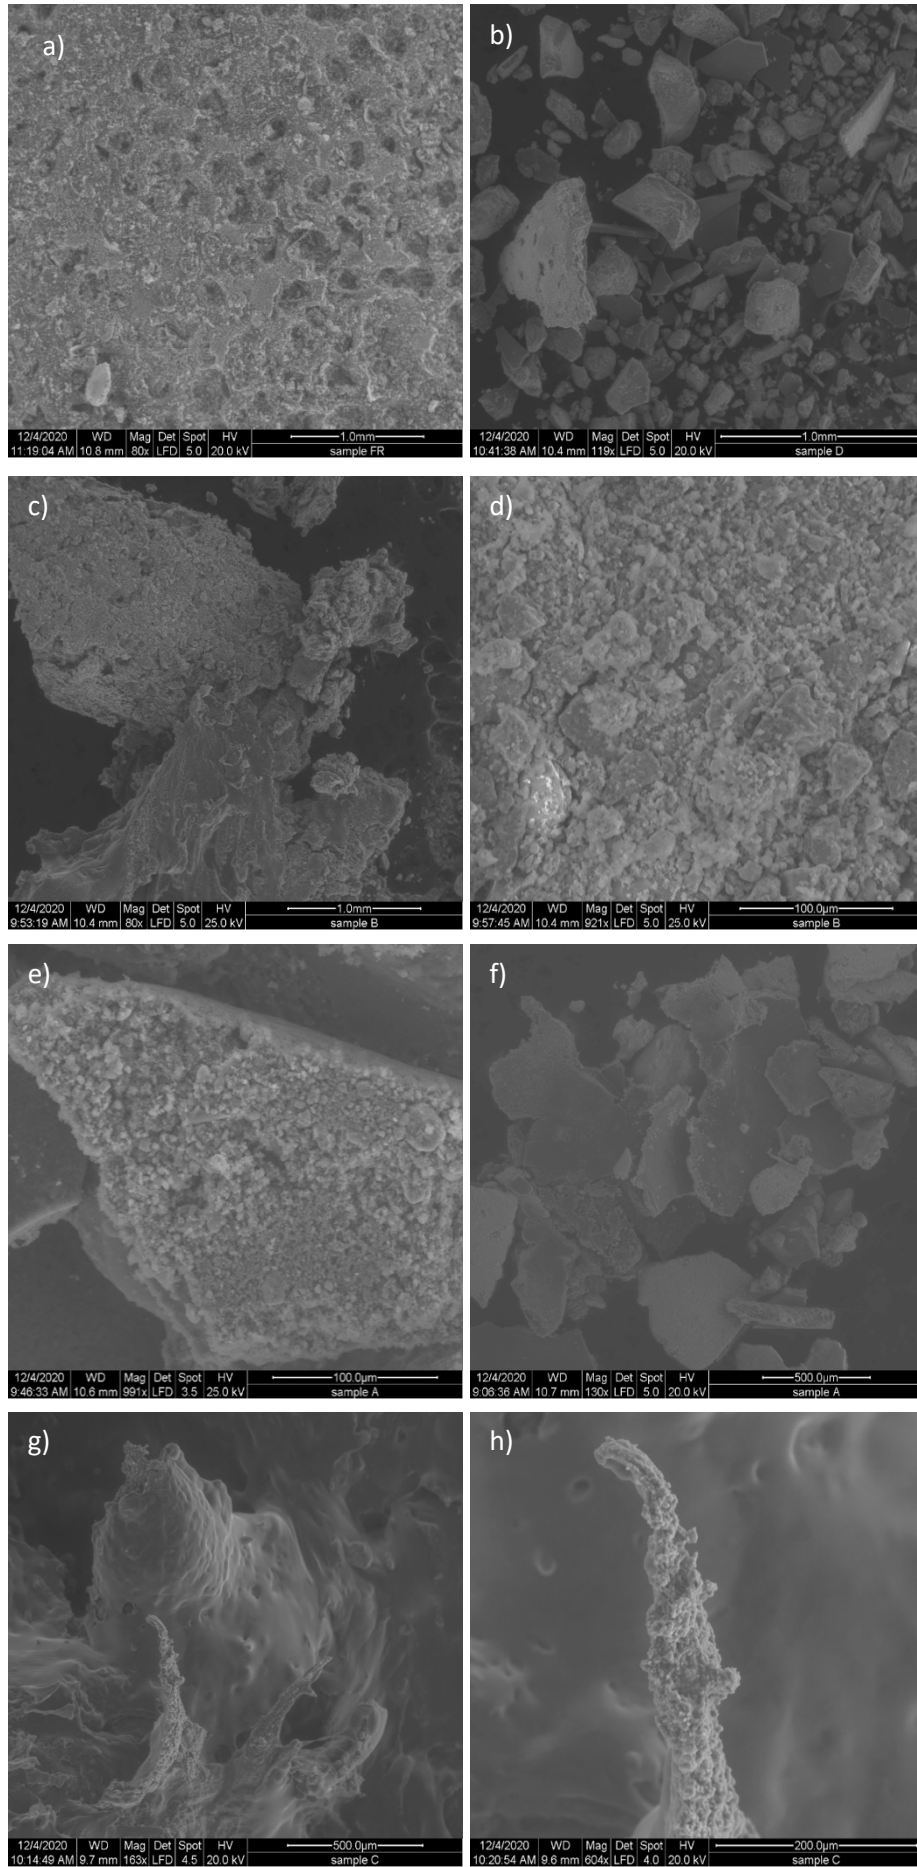

Figure S4. SEM images of raw RM-II (a) and RM after trials RMII\_5%\_28°C (b), RMII\_2%\_28°C (c,d), RMII\_2%\_22° (e,f), RMII\_5%\_22° (g,h).
